# Supplementary material
Source: PubMed Central journal article supplement (PMC3370519)
Supplement: supp_78.12.4117_AEM07710-11_supplemental.pdf [file supp_78.12.4117_AEM07710-11_supplemental.pdf]

**Running title:** *Aspergillus fumigatus* anthraquinone biosynthesis

**Genome-based cluster deletion reveals endocrocin biosynthetic pathway in *Aspergillus fumigatus***

**Fang Yun Lim<sup>1</sup>, Yanpeng Hou<sup>2</sup>, Yiming Chen<sup>3</sup>, Jee-Hwan Oh<sup>4</sup>, Inhyung Lee<sup>4</sup>, Tim S Bugni<sup>2</sup>,  
Nancy P Keller<sup>2,3,\*</sup>**

<sup>1</sup>Department of Bacteriology, University of Wisconsin-Madison, Madison, WI, USA

<sup>2</sup>Pharmaceutical Sciences Division, University of Wisconsin-Madison, Madison, WI, USA

<sup>3</sup>Department of Medical Microbiology and Immunology, University of Wisconsin-Madison, Madison, WI, USA

<sup>4</sup>Department of Advanced Fermentation Fusion Science and Technology, Kookmin University, Seoul 136-702, Korea

Keywords: endocrocin, anthraquinone, non-reducing polyketide synthase, LaeA, metallo- $\beta$ -lactamase thioesterase, emodin, asperthecin

**\*Corresponding author**

Professor Nancy P. Keller

Department of Bacteriology

University of Wisconsin-Madison

1550 Linden Drive

Madison WI, U.S.A.

**SUPPLEMENTAL TABLE**

Table S1. Primers used in this study.

| <b>Primer Name</b>             | <b>Primer Sequence (5'-sequence-3')</b>                  | <b>Purpose</b>                           |
|--------------------------------|----------------------------------------------------------|------------------------------------------|
| OE Afu4g00210 5' Flank For     | GCCTTGGAATAGAGCCATGTAC                                   | <i>OE::encA</i> 5' Flank                 |
| OE Afu4g00210 5' Flank Rev     | CAATTCGCCCTATAGTGAGTCGTATTAC<br>GGTTGAATGTAGATCAGGTCAAC  |                                          |
| OE Afu4g00210 3' Flank For     | GCTACCCCGCTTGAGCAGACATCACCAT<br>GCAAGGCCCAAGCCAATTG      | <i>OE::encA</i> 3' Flank                 |
| OE Afu4g00210 3' Flank Rev     | CGTGTCGGTATGACTCTCTAC                                    |                                          |
| FY 4G00210 INTKO 5'F FOR       | CCAATTGGCCCTGTTCTAC                                      | <i>AencA</i> 5' Flank                    |
| FY 4G00210 INTKO 5'F REV       | CAGCTTATCGATGATAAGCTGTCAAACA<br>TGGGCTGGTTCGATGAAGCAGCC  |                                          |
| FY 4G00210 INTKO 3'F FOR       | CGTGTTGATAGCACACCCTCGGAATAGT<br>CACGCAGGCGGGCGATTCAAC    | <i>AencA</i> 3' Flank                    |
| FY 4G00210 INTKO 3'F REV       | GACGGTCTTTGCGTCTACC                                      |                                          |
| FY Extended T7 FOR             | CGTAATACGACTCACTATAGGG                                   | <i>gpdA(p)::pyrG</i> for OE cassette     |
| FY <i>gpdA(p)</i> Fusion REV   | CATGGTGATGTCTGCTCAAG                                     |                                          |
| FY A. para <i>pyrG</i> 2KB FOR | CATGTTTGACAGCTTATCATCG                                   | <i>pyrG</i> for deletion cassette        |
| FY A. para <i>pyrG</i> 2KB REV | GACTATTCCGAGGGTGTGCTAT                                   |                                          |
| FY 4G00220 5'F FOR             | CCAGACCTTGCAGAGGATC                                      | <i>AencB</i> 5' Flank                    |
| FY 4G00220 5'F REV             | CTGAGATCCATAGGATCAGCTTATCGAT<br>GCTATGGCCTGAGTTCAGCGG    |                                          |
| FY 4G00220 3'F FOR             | CGTGTTGATAGCACACCCTCGGAATAGT<br>CCGCCAATGTGAGCCAAGAGAA   | <i>AencB</i> 3' Flank                    |
| FY 4G00220 3'F REV             | TTCAGGTGCGTCGATTCC                                       |                                          |
| FY 4G00220 NEST FOR            | GATGTCGTTGCTGTGCTCG                                      | <i>AencB</i> deletion cassette           |
| FY 4G00220 NEST REV            | GCATGGGATCTGTCTGCA                                       |                                          |
| FY 4G00225 5'F FOR             | ATCACAGATCGCCACTGC                                       | <i>AencC</i> 5' Flank whole ORF deletion |
| FY 4G00225 5'F REV             | CTGAGATCCATAGGATCAGCTTATCGAT<br>GACATGACGAACAA CCTACGGC  |                                          |
| FY 4G00225 3'F FOR             | CGTGTTGATAGCACACCCTCGGAATAGT<br>CGCTAGACATCGAGGTAGTGGT   | <i>AencC</i> 3' Flank whole ORF deletion |
| FY 4G00225 3'F REV             | CCAGTATGACCAAGCCAC                                       |                                          |
| FY 4G00225 NEST FOR            | CCGAGCGAGATGCAAGGA                                       | <i>AencC</i> whole ORF deletion cassette |
| FY 4G00225 NEST REV            | CTATGGCCATGACAGCCAAG                                     |                                          |
| FY 4G00225INT 5'F FOR          | GTCTATGGCCTGAGTTCAG                                      | <i>AencC</i> 5' Flank internal deletion  |
| FY 4G00225INT 5'F REV          | CTGAGATCCATAGGATCAGCTTATCGAT<br>GCACAGAGACCAGGCTGTGTGCTG |                                          |
| FY 4G00225INT 3'F FOR          | ACGTGTTGATAGCACACCCTCGGAATAG                             | <i>AencC</i> 3' Flank                    |

|                       |                                                          |                                         |
|-----------------------|----------------------------------------------------------|-----------------------------------------|
|                       | TCAGCATGGTGTGCTTCCGATCGC                                 | internal deletion                       |
| FY 4G00225INT 3'F REV | GGGATCGCTCCAAGATCG                                       |                                         |
| FY 4G00230 5'F FOR    | GAGGTTCTGGAGTGGCTAT                                      | <i>AencD</i> 5' Flank                   |
| FY 4G00230 5'F REV    | CTGAGATCCATAGGATCAGCTTATCGAT<br>GGCTAGCTTATGAGTGCCTGCA   |                                         |
| FY 4G00230 3'F FOR    | CGTGTGATAGCACACCCTCGGAATAGT<br>CGGTCCTTGCCTAAGTAGACC     | <i>AencD</i> 3' Flank                   |
| FY 4G00230 3'F REV    | ATCGATCAGCAGCCGTTT                                       | <i>AencD</i> deletion cassette          |
| FY 4G00230 NEST FOR   | TGTTGGACTCTCGTTCGC                                       |                                         |
| FY 4G00230 NEST REV   | CAGGTTGCAAGAGCCAT                                        |                                         |
| FY 4G00200B 5'F FOR   | GGTTCAACCTAGTGGACT                                       | $\Delta$ AFUA_4G00200 5' Flank          |
| FY 4G00200B 5'F REV   | CTGAGATCCATAGGATCAGCTTATCGAT<br>GACAATGGCGACTGGATGC      |                                         |
| FY 4G00200B 3'F FOR   | CGTGTGATAGCACACCCTCGGAATAGT<br>CGAGTGCGGACGAGGAATTCTA    | $\Delta$ AFUA_4G00200 3' Flank          |
| FY 4G00200B 3'F REV   | CGCGTAGTATGGCTCAAC                                       | $\Delta$ AFUA_4G00200 deletion cassette |
| FY 4G00200B NEST FOR  | CATATCCATCTCGCAAACCGC                                    |                                         |
| FY 4G00200B NEST REV  | ACAATGGCGACTGGATGC                                       |                                         |
| FY 4G00240 5'F FOR    | CGTCCATACAGATGCGGT                                       | $\Delta$ AFUA_4G00240 5' Flank          |
| FY 4G00240 5'F REV    | CTGAGATCCATAGGATCAGCTTATCGAT<br>GCATGCAAGGTTAGCCCGAAGTG  |                                         |
| FY 4G00240 3'F FOR    | ACGTGTTGATAGCACACCCTCGGAATAG<br>TCGGACCGGAGAGATCCAAAGATC | $\Delta$ AFUA_4G00240 3' Flank          |
| FY 4G00240 3'F REV    | CGCTCCTAAGAAATGAGCAC                                     | $\Delta$ AFUA_4G00240 deletion cassette |
| FY 4G00240 NEST FOR   | CGGCCTTCTAACACGCCA                                       |                                         |
| FY 4G00240 NEST REV   | GTGTGTCCCGTGAGTCAG                                       |                                         |
| FY 4G00250 5'F FOR    | GGTAGGTGTAGAGAGCAGG                                      | $\Delta$ AFUA_4G00250 5' Flank          |
| FY 4G00250 5'F REV    | CTGAGATCCATAGGATCAGCTTATCGAT<br>GAGGAGAGGATCCCGTGTCGAAC  |                                         |
| FY 4G00250 3'F FOR    | ACGTGTTGATAGCACACCCTCGGAATAG<br>TCGATCTTAGTCAAGCCTCCGGTA | $\Delta$ AFUA_4G00250 3' Flank          |
| FY 4G00250 3'F REV    | CGCTCCTGTTACTGACGG                                       | $\Delta$ AFUA_4G00250 deletion cassette |
| FY 4G00250 NEST FOR   | GCAATCATCTAGCCCGCG                                       |                                         |
| FY 4G00250 NEST REV   | GCGGTGACAGGGAATAAC                                       |                                         |
| FY 4G00210 INTB FOR   | CAAGAGTTGGAACCATAACCTC                                   | Northern probe of <i>encA</i>           |
| FY 4G00210 INTB REV   | GCTGCAGATTGATGATGTCAG                                    | Northern probe of <i>encB</i>           |
| FY 4G00220 INT FOR    | GGACCAACACATACATTCTGGGC                                  |                                         |
| FY 4G00220 INT REV    | CTGCAGCGCAAGTAGCACTTG                                    | Northern probe of <i>encC</i>           |
| FY 4G00225 INT FOR    | TACAGCACACAGCCTGGTCT                                     |                                         |
| FY 4G00225 INT REV    | CTCCAGTGACTGAGCAGCTC                                     | Northern probe of <i>encD</i>           |
| FY 4G00230 INT FOR    | GACCAAGCCACAGCCACC                                       |                                         |
| FY 4G00230 INT REV    | CTCTCTCGACGGTGCCTC                                       |                                         |
| FY 4G00200 INT FOR    | CGACTATGACGAGGAGGAAGTC                                   | Northern probe of F box protein         |
| FY 4G00200 INT REV    | CCATCTCGCTCTTAAGGAAGGG                                   |                                         |
| FY 4G00240 INTB FOR   | GCCTGCGTACGAGCCTTCTT                                     | PCR screen of $\Delta$ AFUA_4G00240     |
| FY 4G00240 INTB REV   | CGGCTCTCTTCGATGCGC                                       |                                         |

|                                   |                                                             |                                                                      |
|-----------------------------------|-------------------------------------------------------------|----------------------------------------------------------------------|
| FY 4G00250 INT FOR                | CGCCGATATTCTCGAGTCTG                                        | PCR screen of<br>$\Delta$ AFUA_4G00250                               |
| FY 4G00250 INT REV                | GGATGGCAATTCCTGCTTC                                         |                                                                      |
| FY <i>gpdA</i> int FOR            | GAAGGGTGGTGCCAAGAAG                                         | Northern probe of<br><i>gpdA</i> , multiplex PCR<br>internal control |
| FY <i>gpdA</i> int REV            | CAACGGAGACGTTGGAGGT                                         |                                                                      |
| FY <i>fumi laeA</i> Int FOR       | CCTGACAGATACCCTTGC                                          | Northern probe of<br><i>laeA</i>                                     |
| FY <i>fumi laeA</i> Int REV       | GCCTCCGATTTAACATCGGC                                        |                                                                      |
| FY <i>encD</i> comp (NotI) FOR    | TATAGCGGCCGCTCTTGAGGAACGTCTG<br>CCTGC                       | EncD<br>complementation<br>insert                                    |
| FY <i>encD</i> comp (XbaI) REV    | TATATCTAGAGCTGCTCAGTCACTGGAG                                |                                                                      |
| FY <i>pyrG::gpdAp::encD</i> 5'FOR | GTGGCTGTTGCAGGAATG                                          | OE:: <i>encD</i> 5' Flank                                            |
| FY <i>pyrG::gpdAp::encD</i> 5'REV | CAATTCGCCCTATAGTGAGTCGTATTAC<br>GACTGGAATAGTATAACTATTTTCTTG |                                                                      |
| FY <i>pyrG::gpdAp::encD</i> 3'FOR | GCTACCCCGCTTGAGCAGACATCACCAT<br>GACCAAGCCACAGCCACCT         | OE:: <i>encD</i> 5' Flank                                            |
| FY <i>pyrG::gpdAp::encD</i> 3'REV | GCGCTAGACATCGAGGTAGTG                                       |                                                                      |
|                                   |                                                             |                                                                      |

**SUPPLEMENTAL FIGURES**

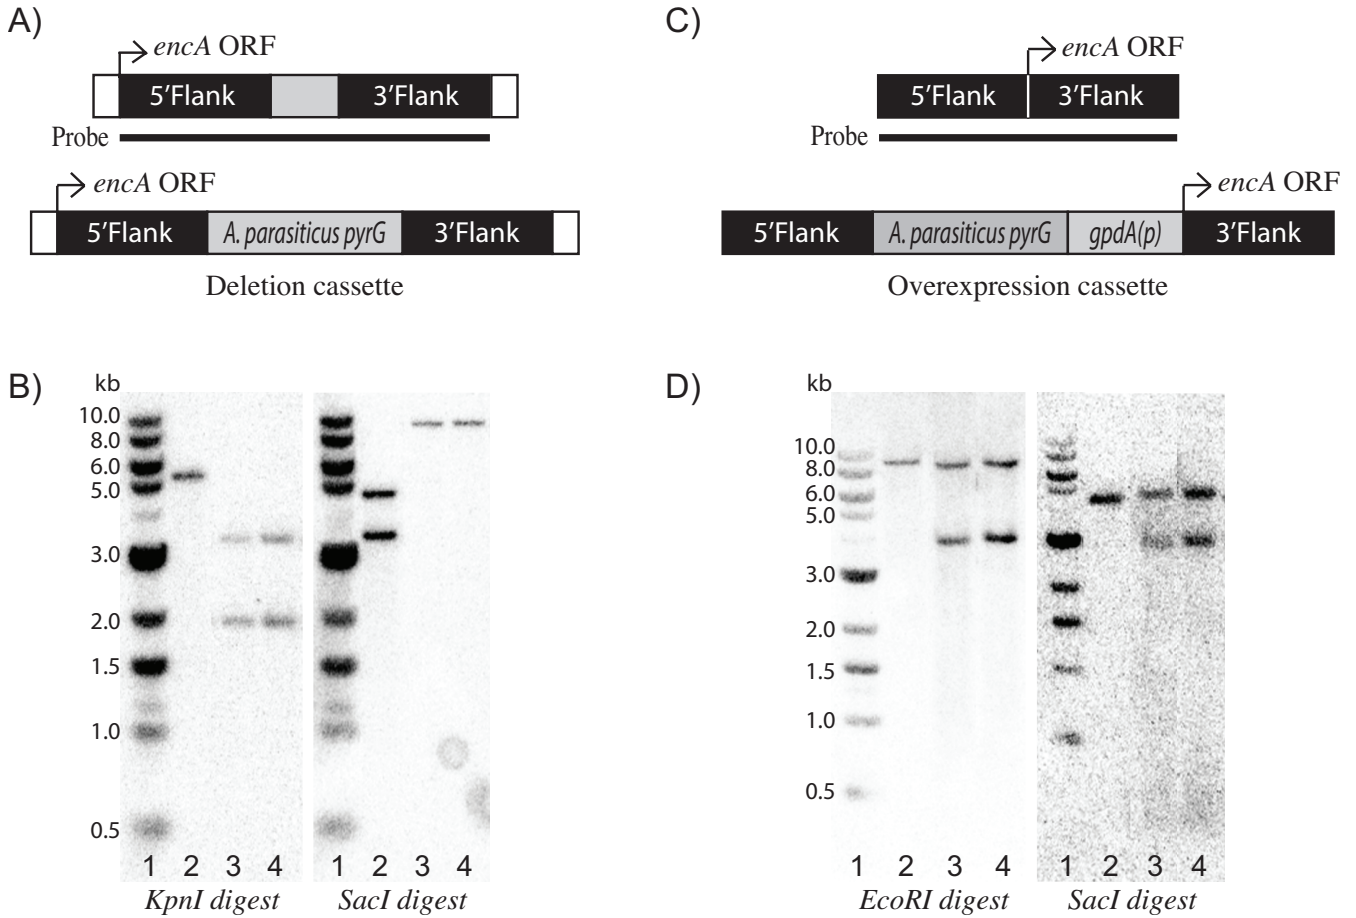

Figure S1. Construction of  $\Delta encA$  and overexpression *encA* mutants. A) Deletion construct. B) Southern analysis of  $\Delta encA$  transformants. Lane 1 (Ladder), Lane 2 (Parental strain), Lane 3 (Transformant 1), and Lane 4 (Transformant 2). C) Overexpression construct. D) Southern analysis of overexpression *encA* transformants Lane 1 (Ladder), Lane 2 (Parental strain), Lane 3 (Transformant 1), and Lane 4 (Transformant 2).

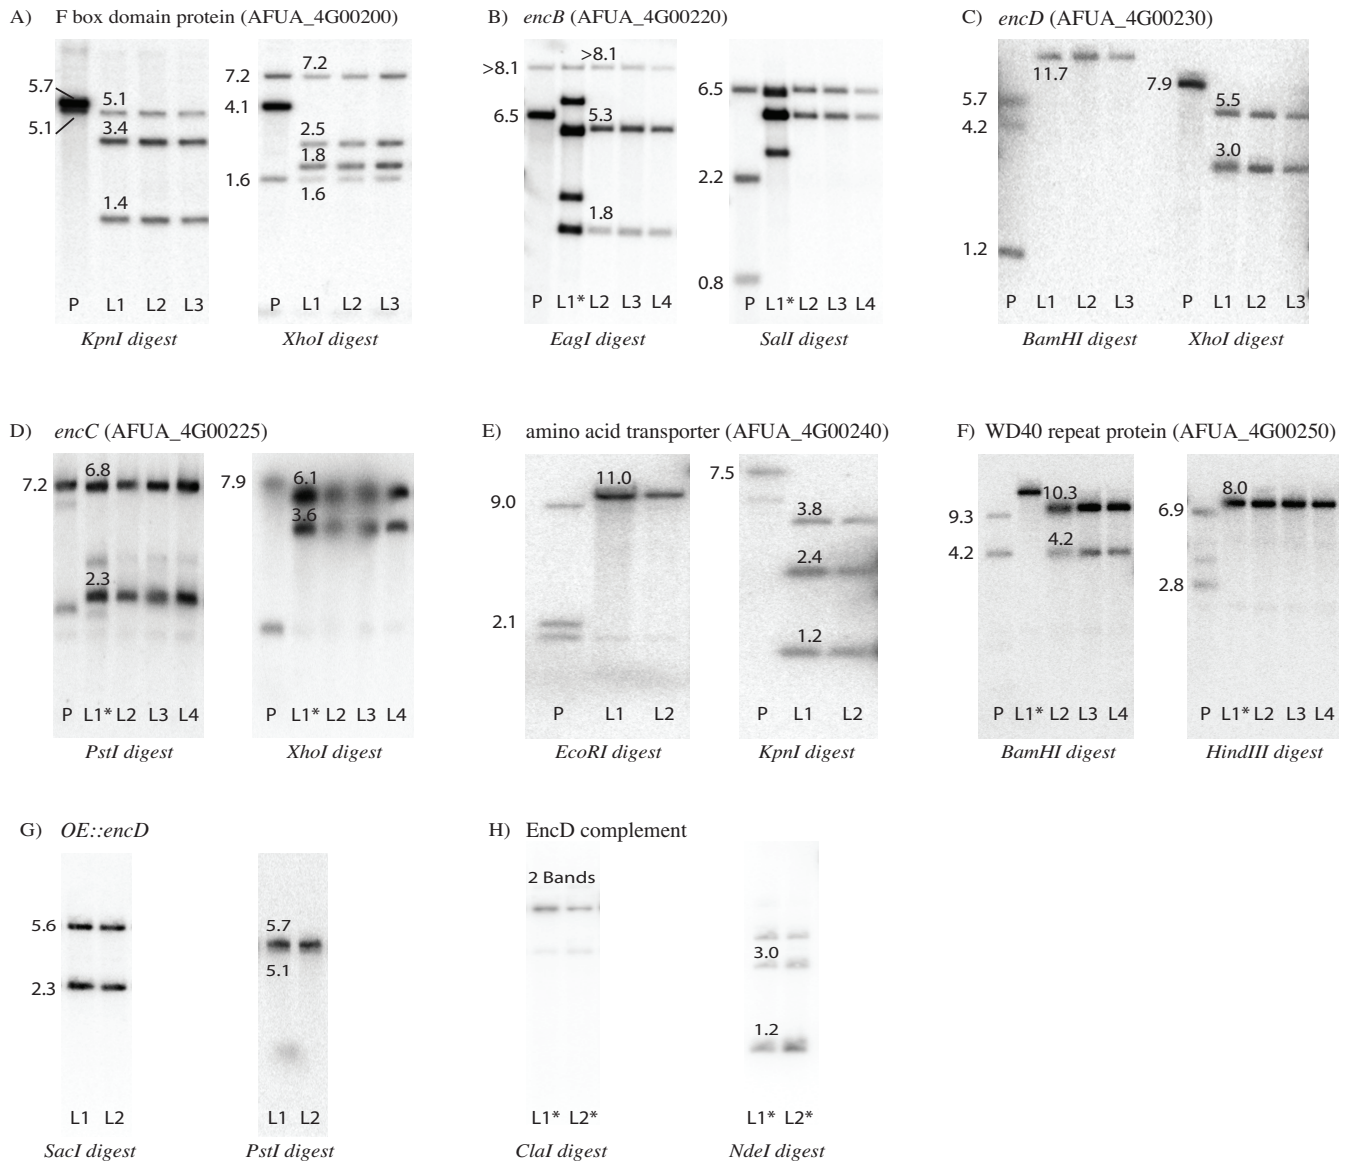

Figure S2. Southern analysis of *A. fumigatus* mutants. A)  $\Delta$ AFUA\_4G00200 B)  $\Delta$ encB C)  $\Delta$ encD D)  $\Delta$ encC E)  $\Delta$ AFUA\_4G00240 F)  $\Delta$ AFUA\_4G00250 G) Overexpression EncD H) EncD complement. P lanes denote parental strain while lanes L1-L4 denote transformants that are positive via initial PCR screen. \* Transformants that contain ectopic integration or multiple integrations of the transformation cassette.

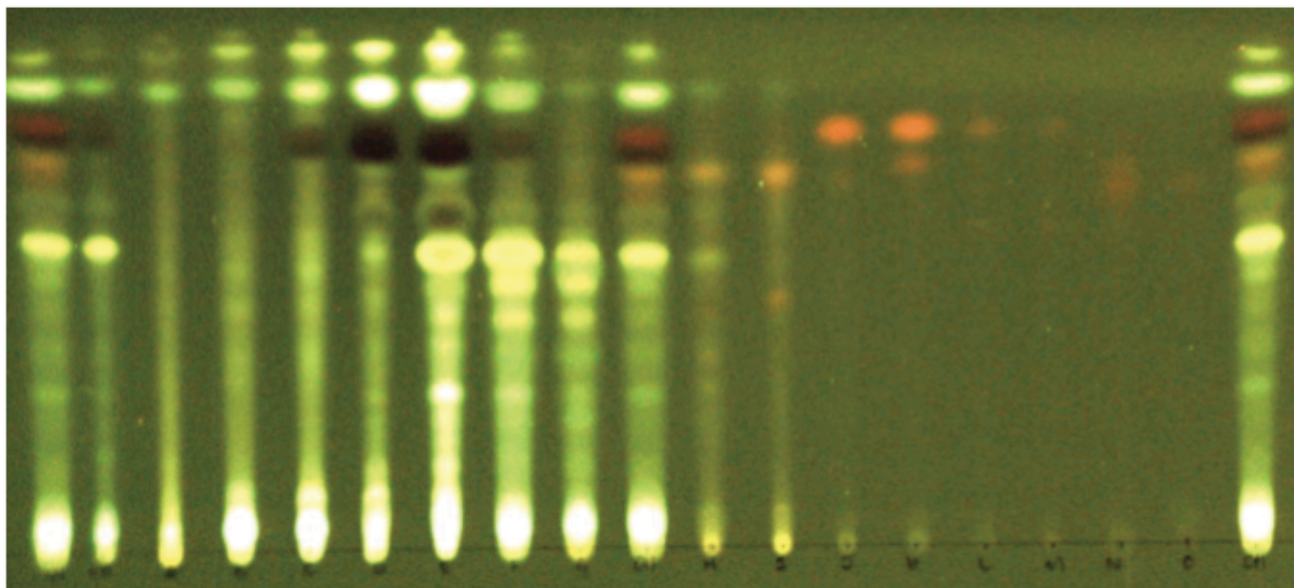

1 2 A B C D E F G 1 H I J K L M N O 1  
Figure S3. TLC analysis of fractions FY01A-O. Plates were developed using Toluene: Ethyl acetate: Formic acid (5:4:0.8; v/v/v). 1 corresponds to the wild type total crude extract and 2 correspond to the *ΔencA* total crude extract.

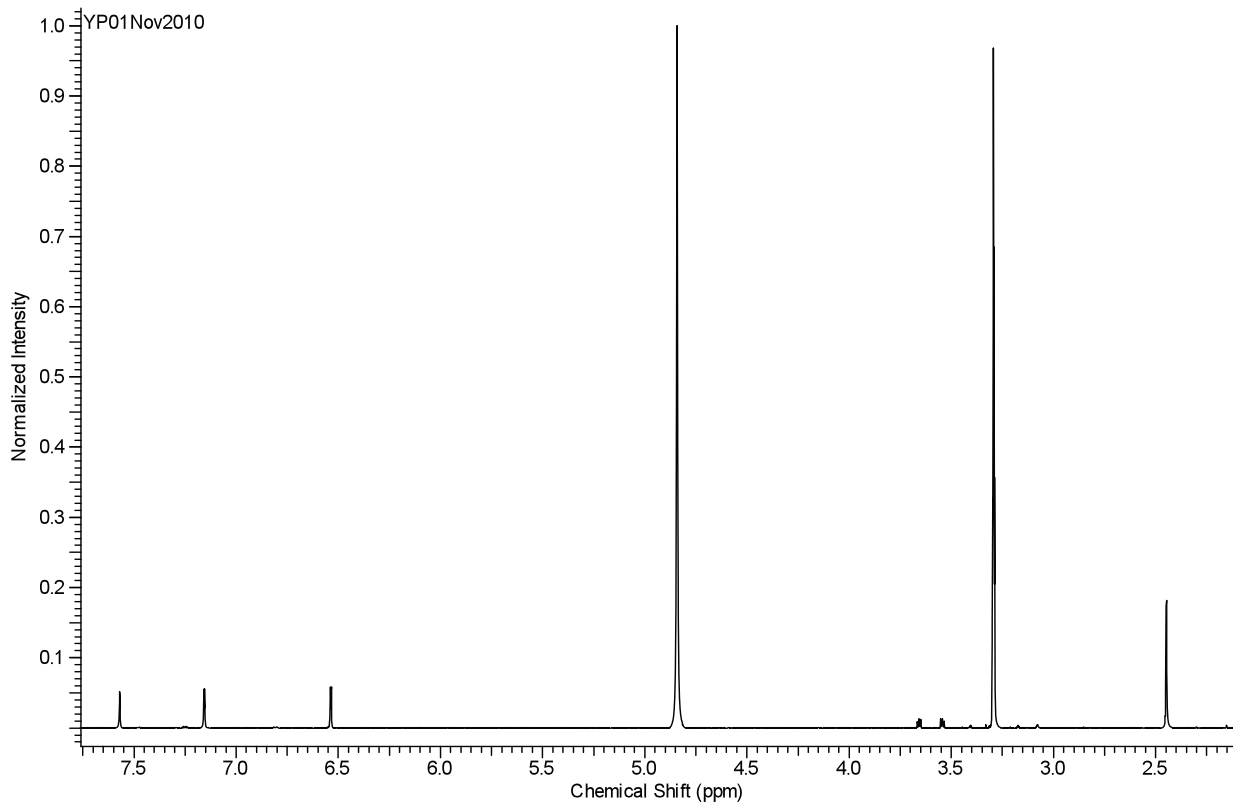

$^1\text{H}$  NMR of endocrocin (600MHz,  $\text{CD}_3\text{OD}$ )

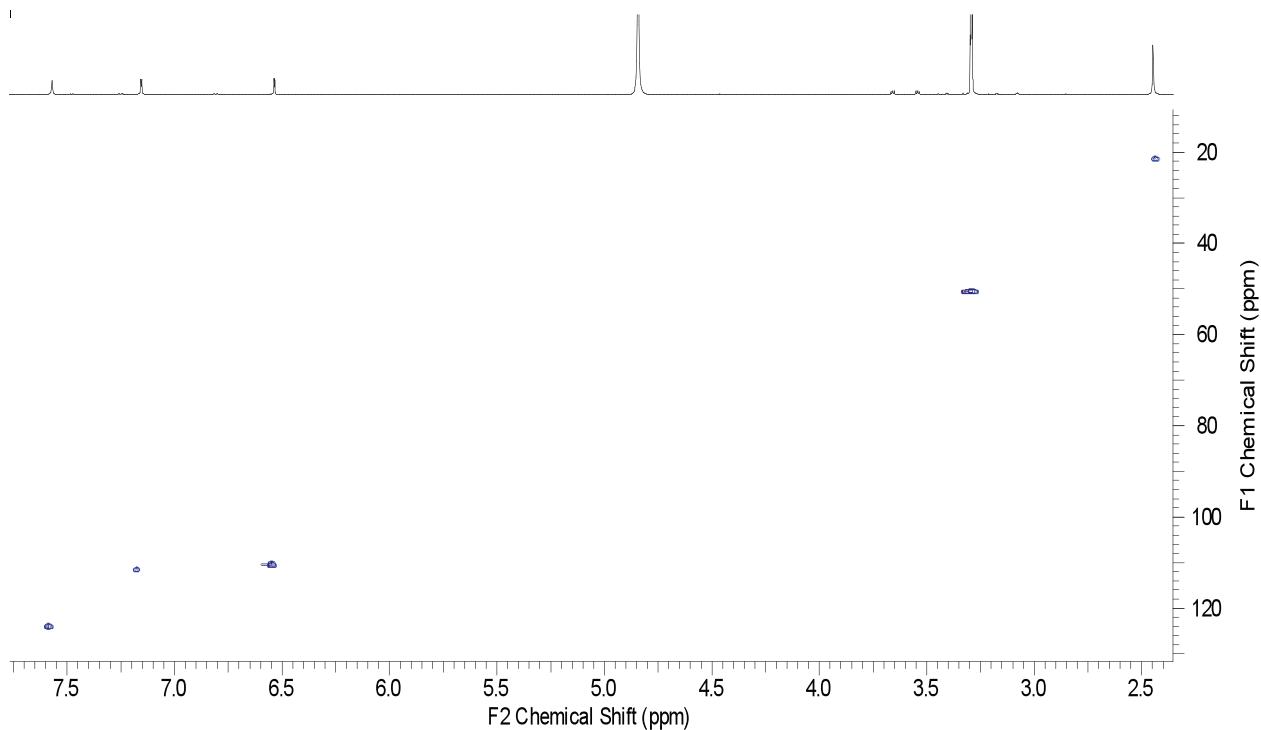

HSQC of endocrocin (600MHz,  $\text{CD}_3\text{OD}$ )

Figure S4. NMR spectra of endocrocin purified from crude extracts of *A. fumigatus*.



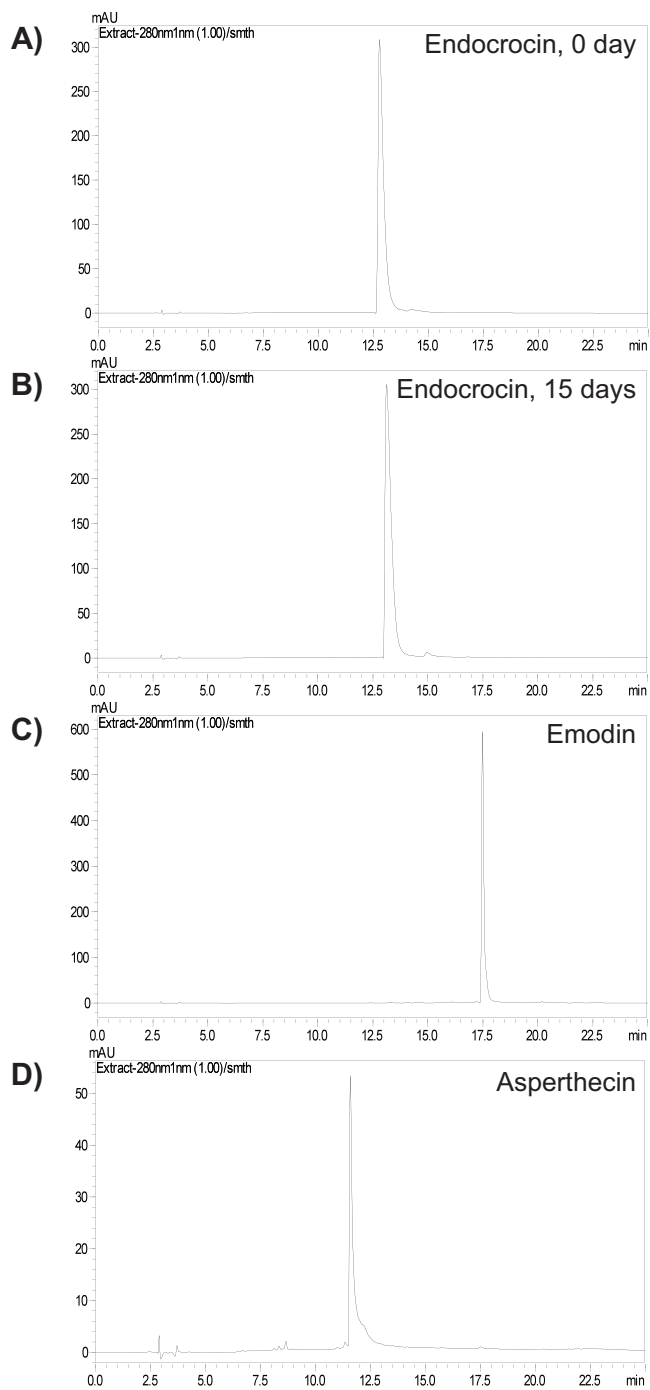

Figure S5. Endocrocin stability assay. A) HPLC chromatogram of endocrocin after incubation at 37°C for 0 days. B) HPLC chromatogram of endocrocin after incubation at 37°C for 15 days. C) HPLC chromatogram of emodin. D) HPLC chromatogram of asperthecin.
